# Supplementary material for: Functional assessment of cell entry and receptor usage for SARS-CoV-2 and other lineage B betacoronaviruses
Source: Springer Nature journal article supplement (doi:10.1038/s41564-020-0688-y), 2020-02-24

SARS-CoV spike with RBD from:

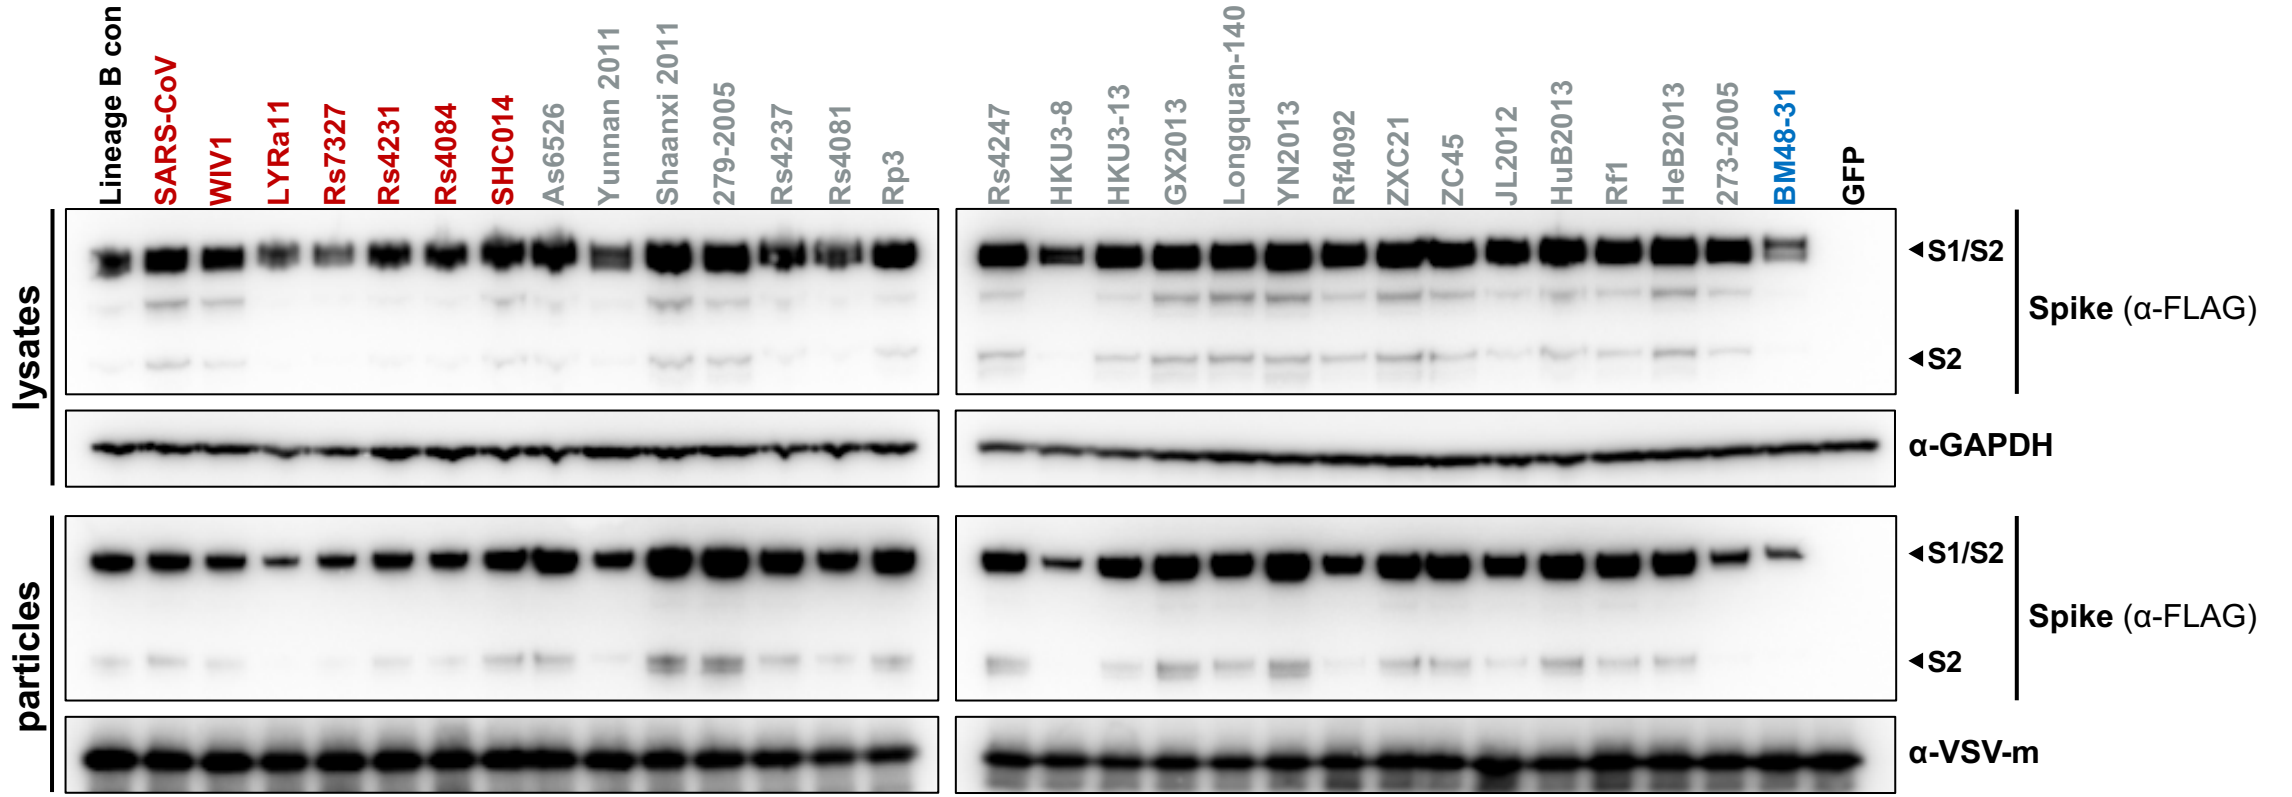

Figure 1d. Unedited westernblot images

Lysate -  $\alpha$ -FLAG – blot 1

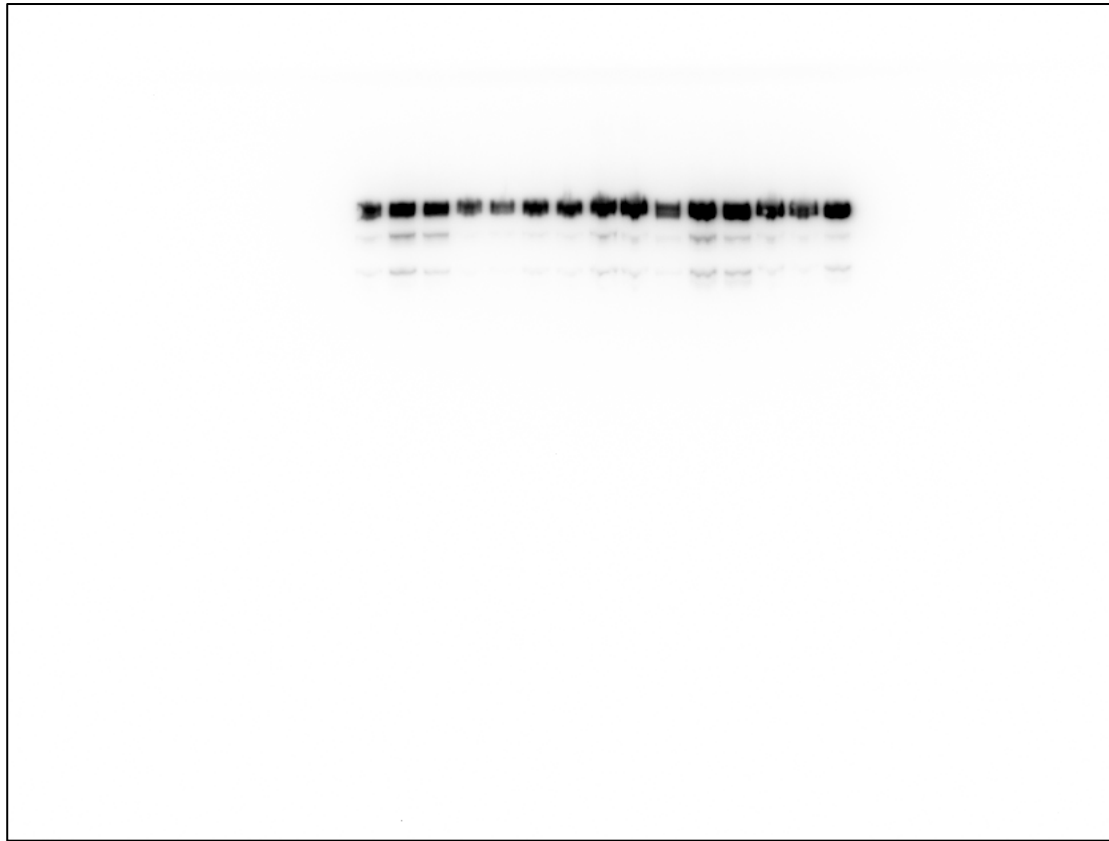

Lysate -  $\alpha$ -FLAG – blot 2

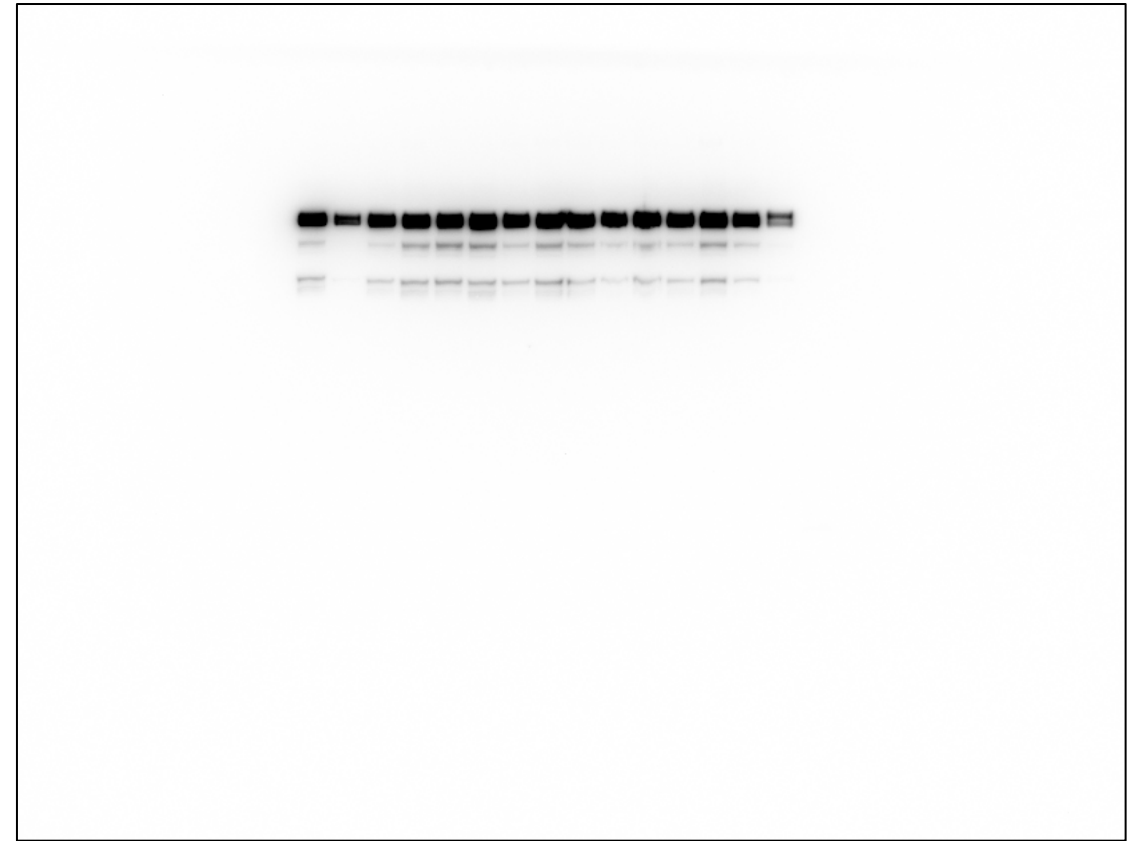

Figure 1d. Unedited westernblot images

Concentrated particles -  $\alpha$ -FLAG – blot 1

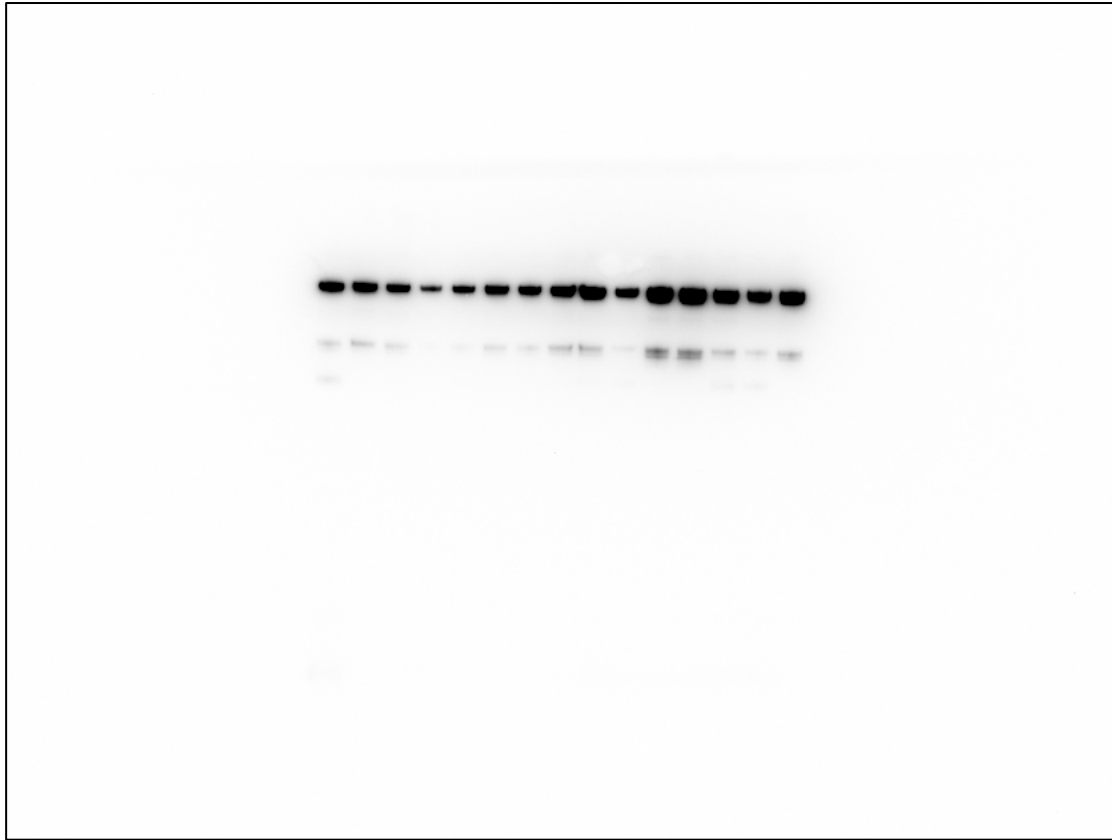

Concentrated particles -  $\alpha$ -FLAG – blot 2

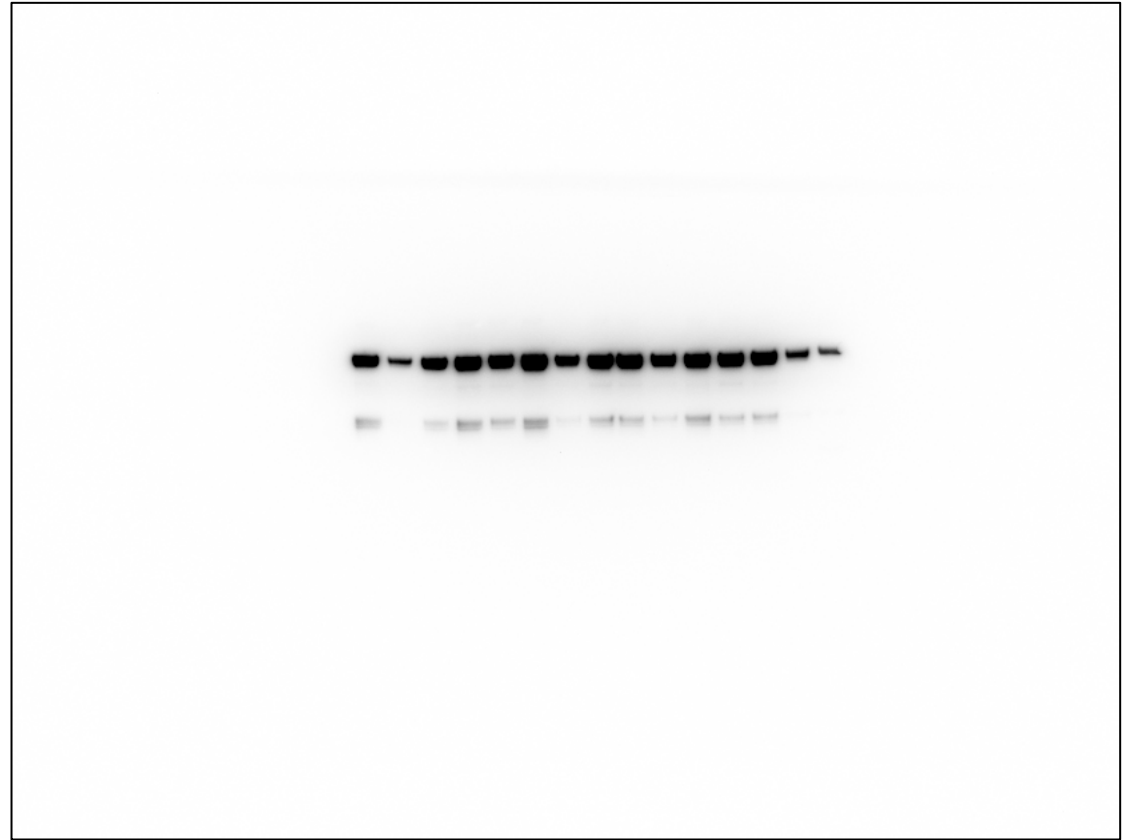

Figure 1d. Unedited westernblot images

Lysate -  $\alpha$ -GAPDH – blot 1

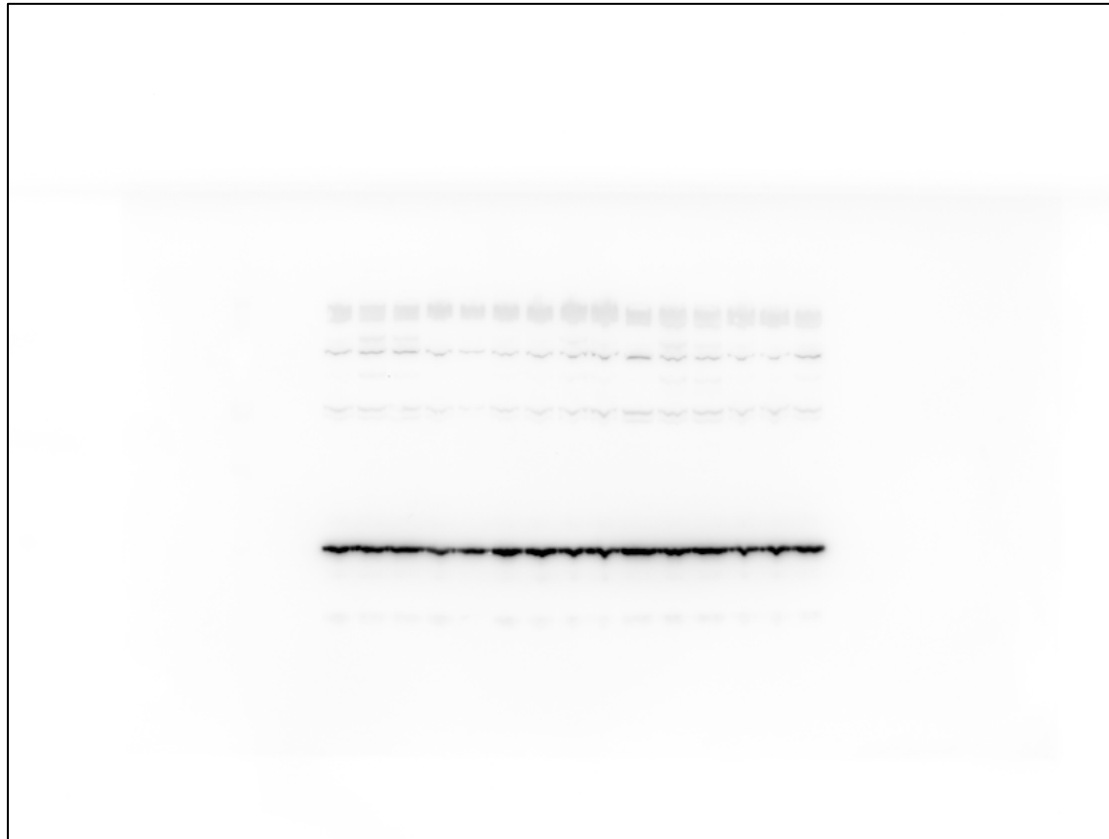

Lysate -  $\alpha$ -GAPDH – blot 2

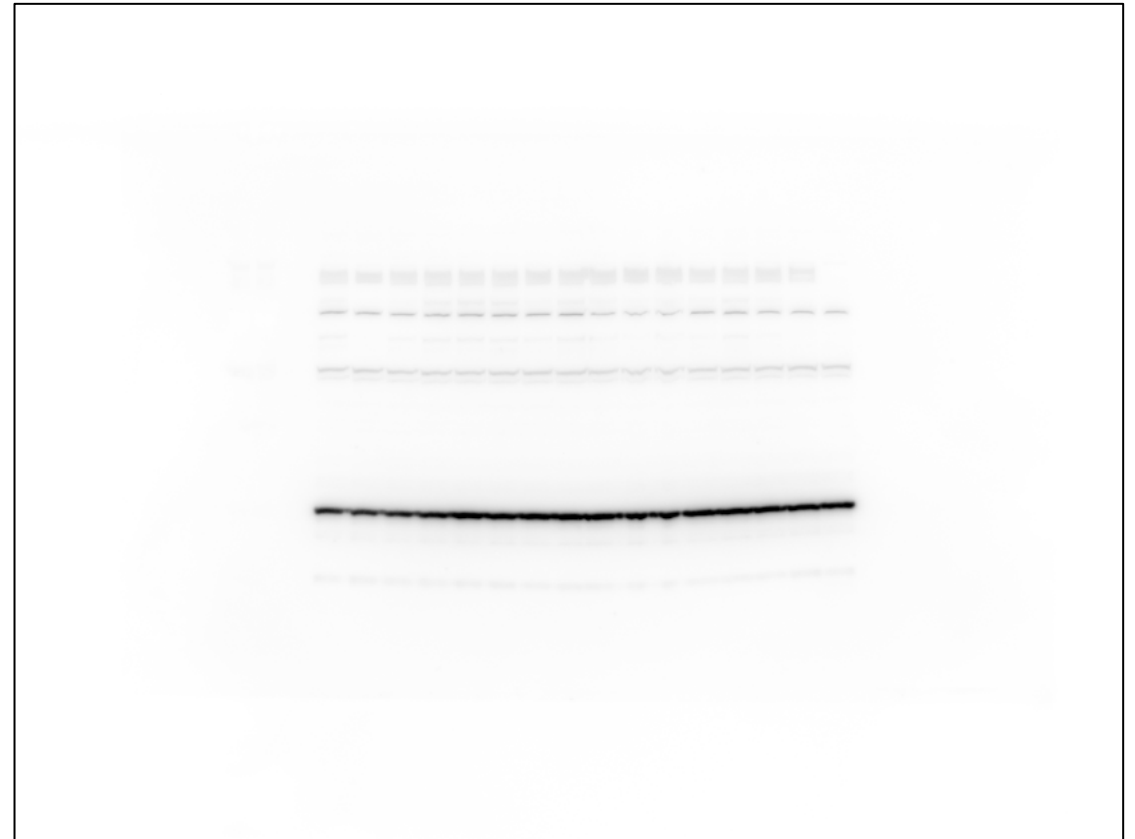

Figure 1d. Unedited westernblot images

Concentrated particles -  $\alpha$ -VSVm – blot 1

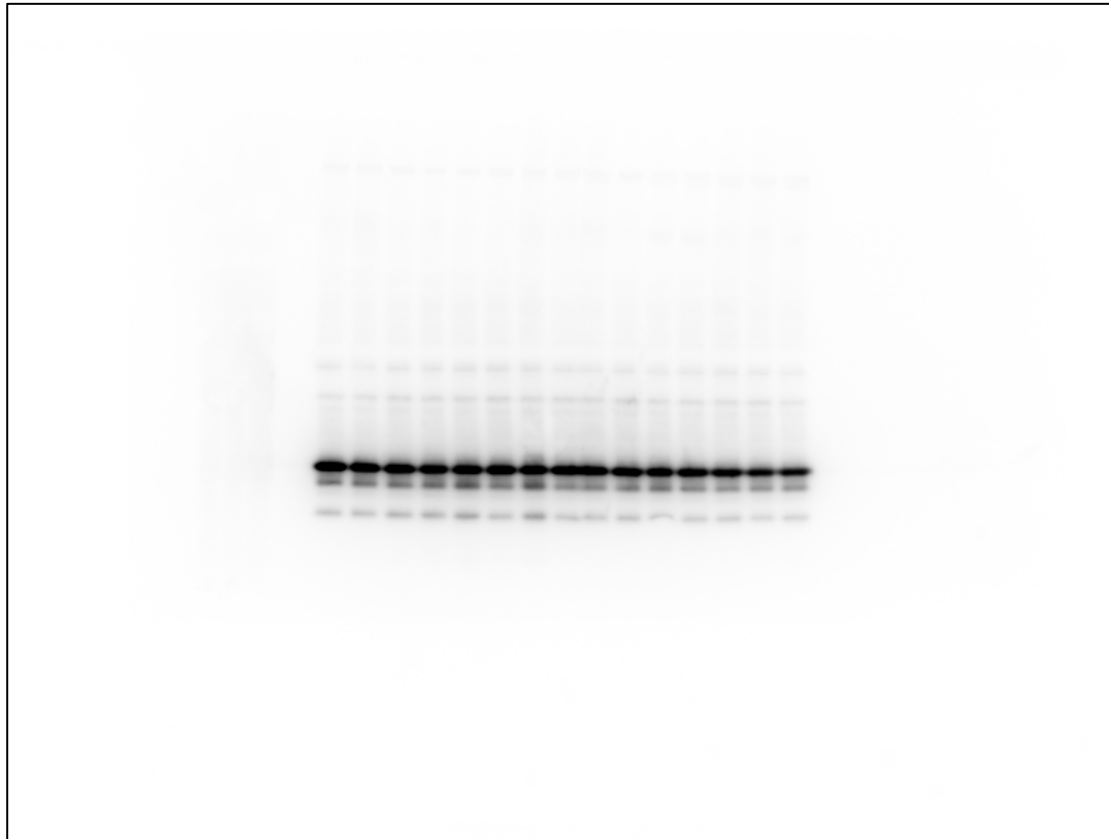

Concentrated particles -  $\alpha$ -VSVm – blot 2

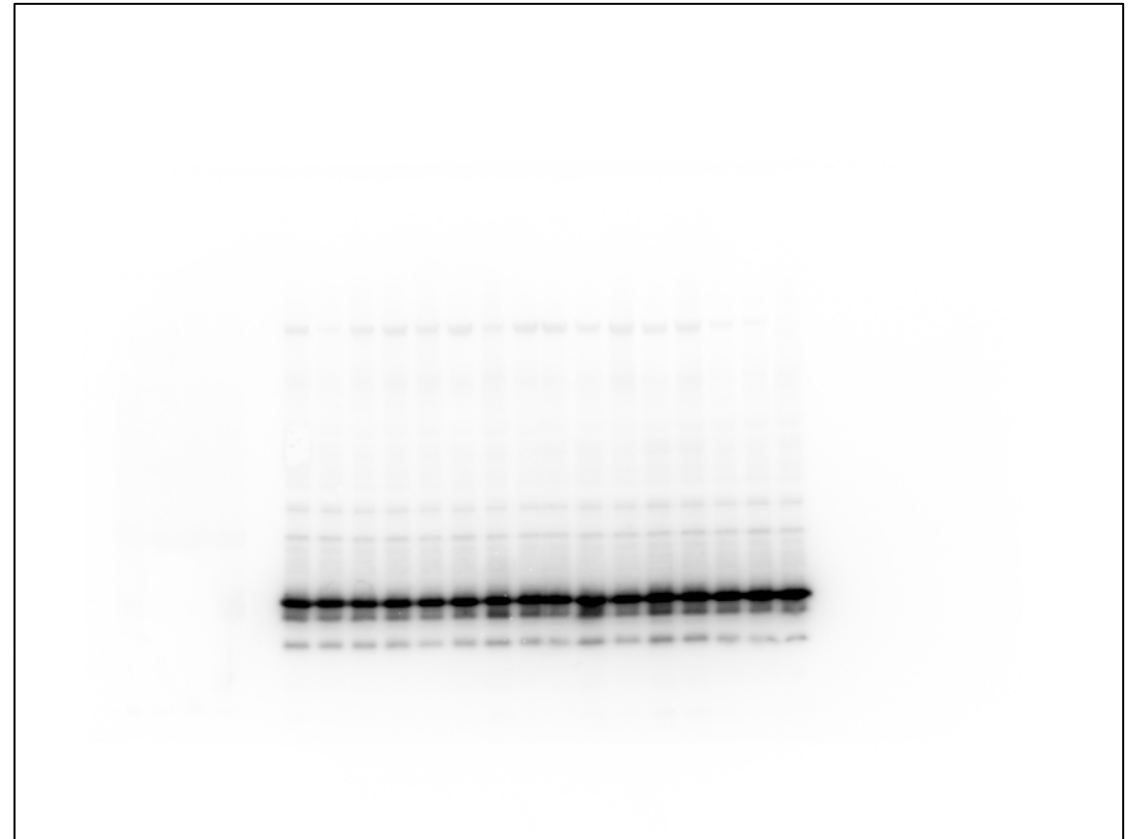

Supplement: 41564_2020_688_MOESM2_ESM.pdf [file 41564_2020_688_MOESM2_ESM.pdf]
