# Supplementary material for: Functional assessment of cell entry and receptor usage for SARS-CoV-2 and other lineage B betacoronaviruses
Source: Springer Nature journal article supplement (doi:10.1038/s41564-020-0688-y), 2020-02-24
Supplement: 41564_2020_688_MOESM5_ESM.pdf [file 41564_2020_688_MOESM5_ESM.pdf]

**C**

**SARS spike  
with RBD  
from:**

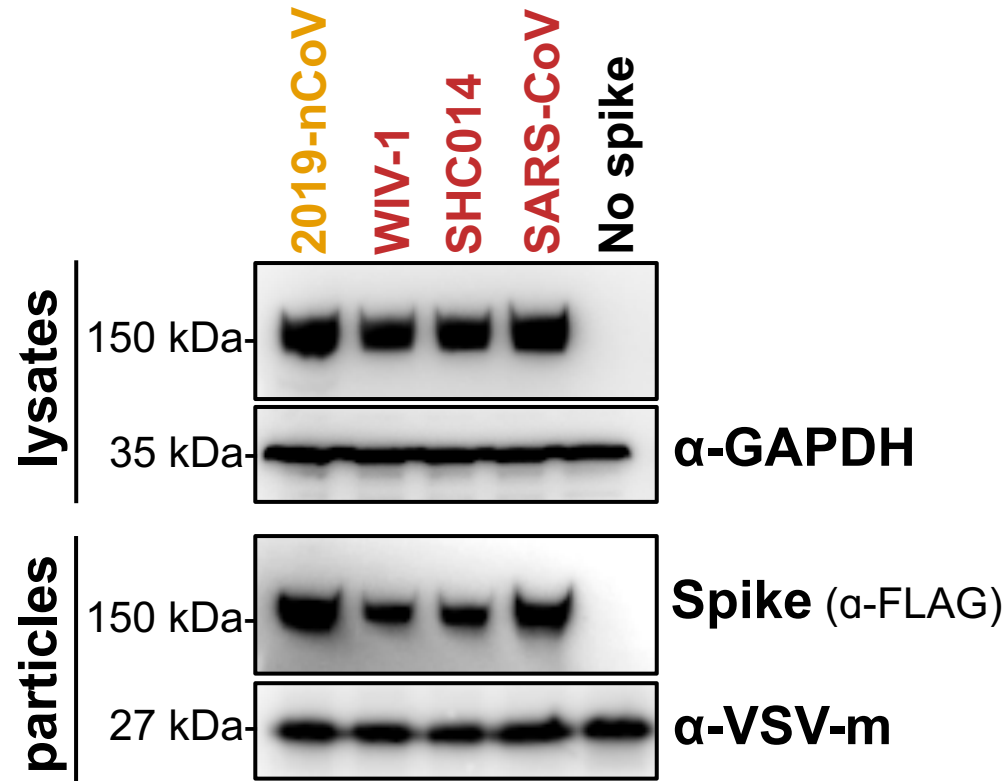

### Short exposure

Lysate -  $\alpha$ -FLAG

Particles -  $\alpha$ -FLAG

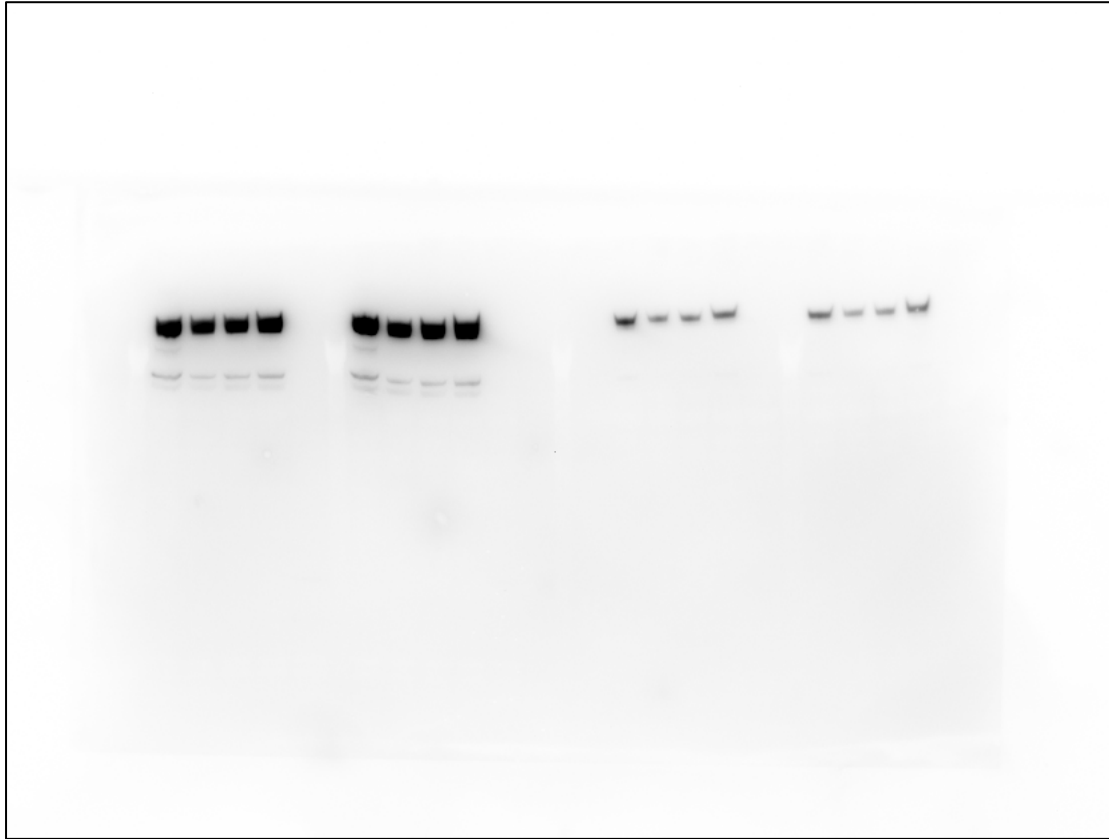

### Long exposure

Lysate -  $\alpha$ -FLAG  
(covered)

Particles -  $\alpha$ -FLAG

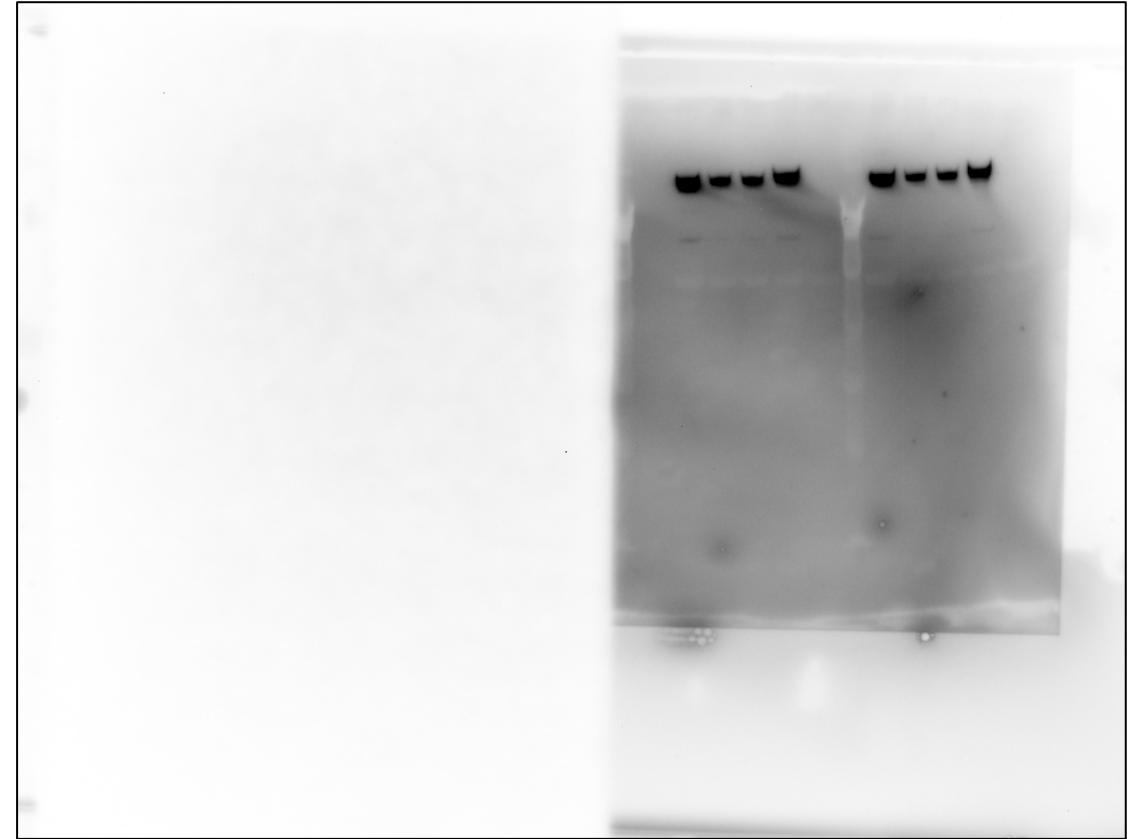

Lysate -  $\alpha$ -GAPDH

Lysate -  $\alpha$ -GAPDH

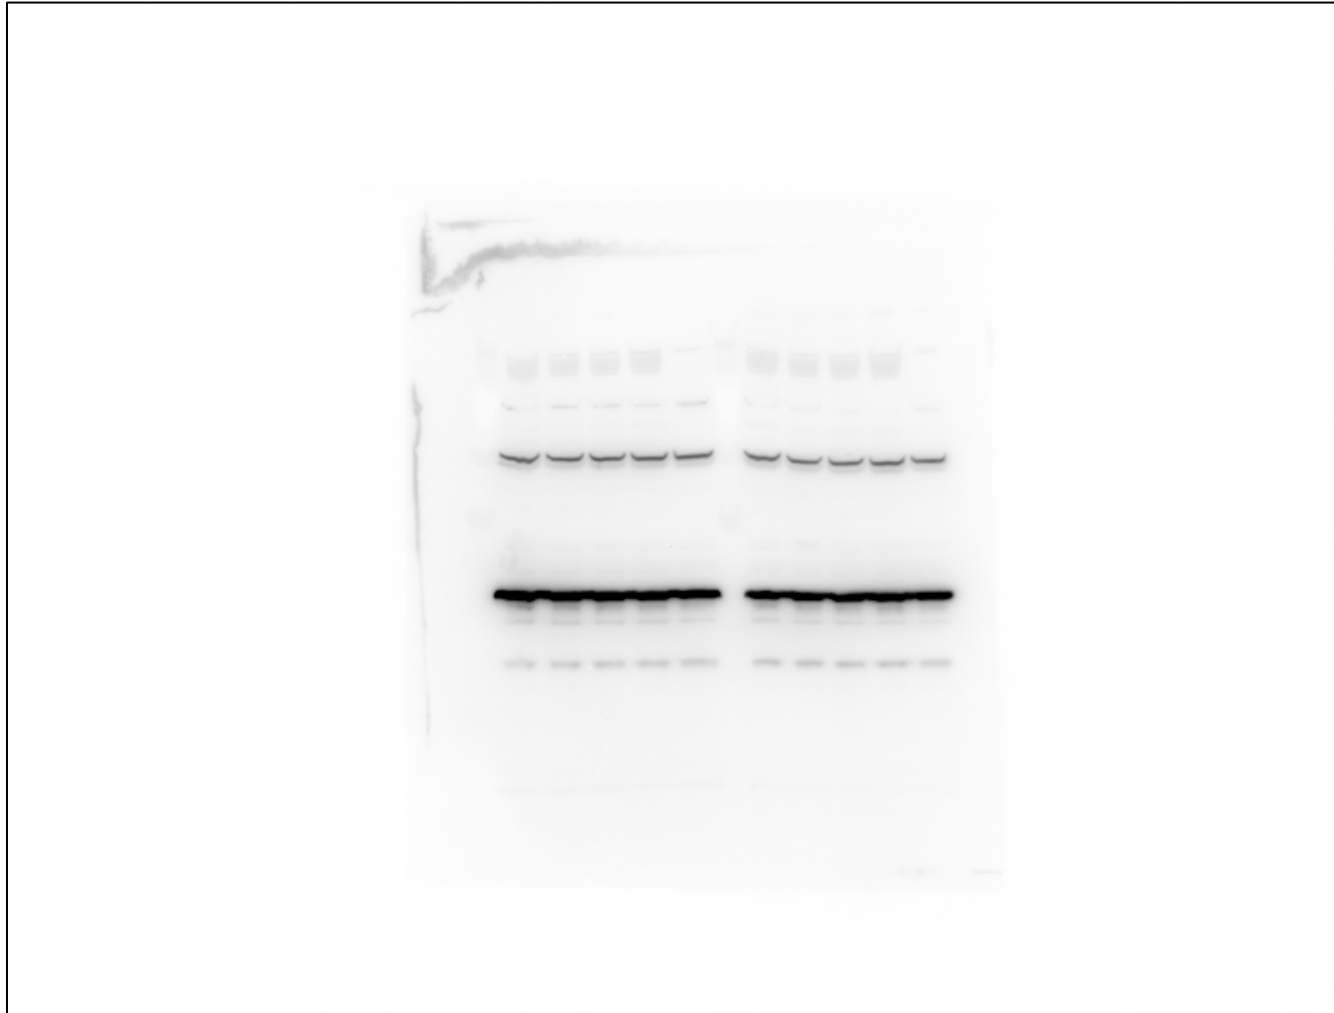

*samples run in duplicate*

particles -  $\alpha$ -VSVm

particles -  $\alpha$ -VSVm

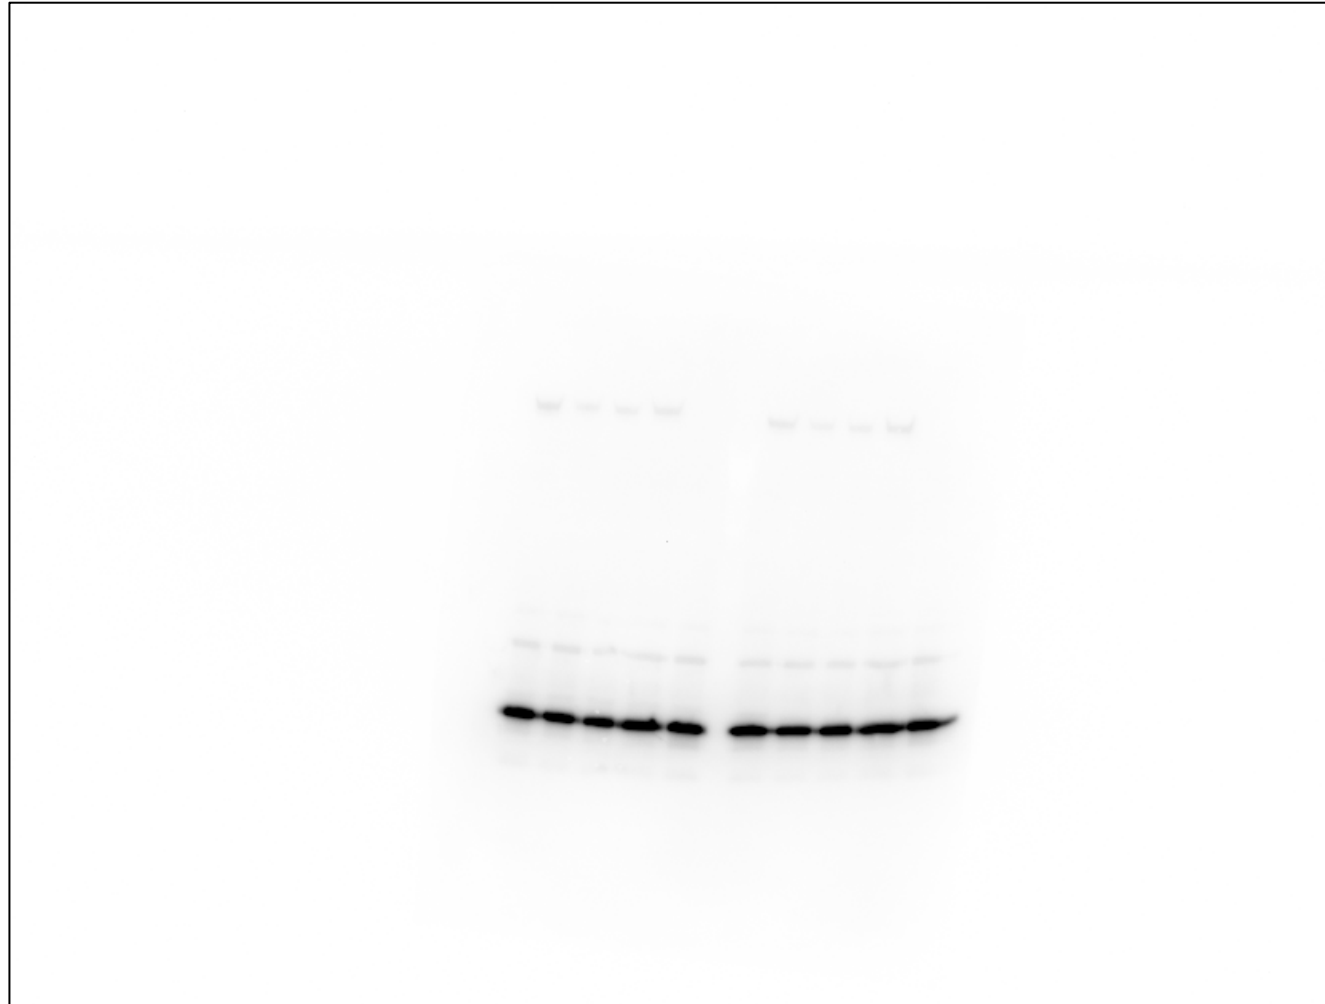

*samples run in duplicate*
