# Supplementary material for: Functional assessment of cell entry and receptor usage for SARS-CoV-2 and other lineage B betacoronaviruses
Source: Springer Nature journal article supplement (doi:10.1038/s41564-020-0688-y), 2020-02-24

spike with RBD from:

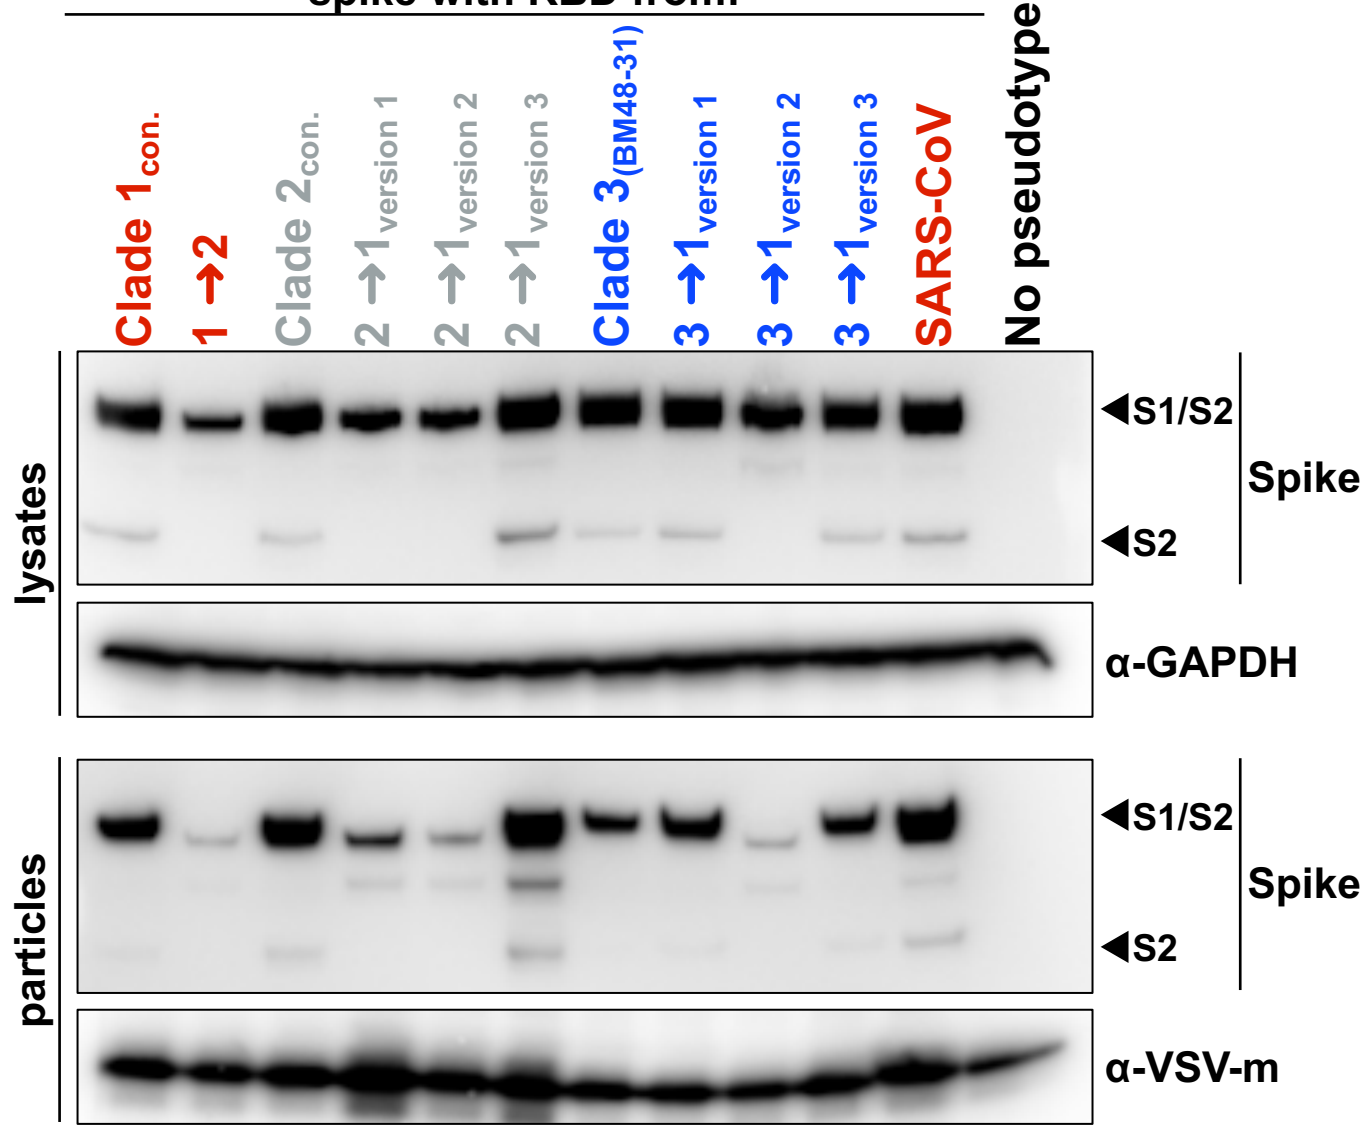

Lysate -  $\alpha$ -FLAG

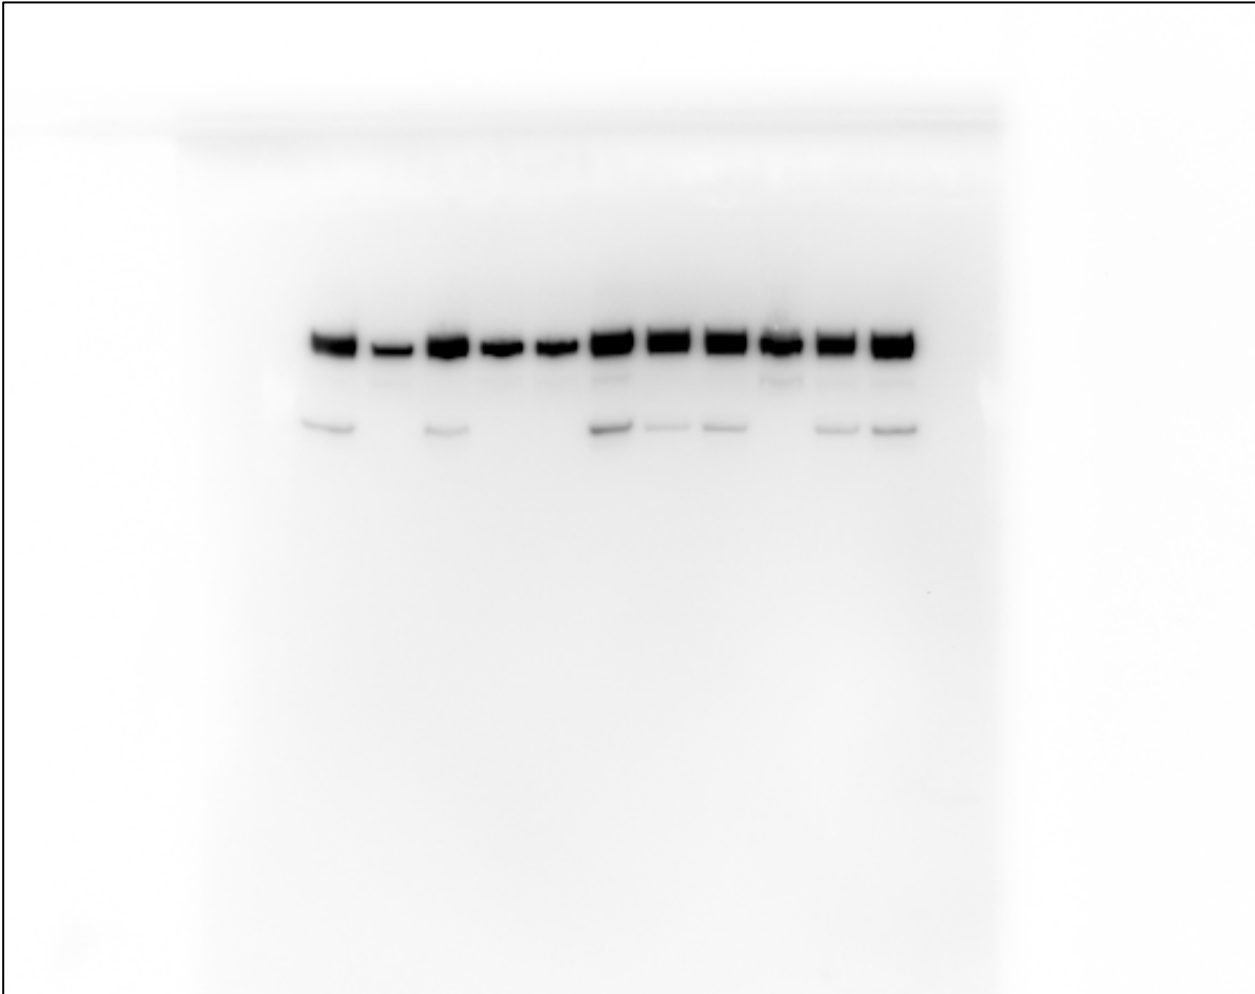

Lysate -  $\alpha$ -GAPDH

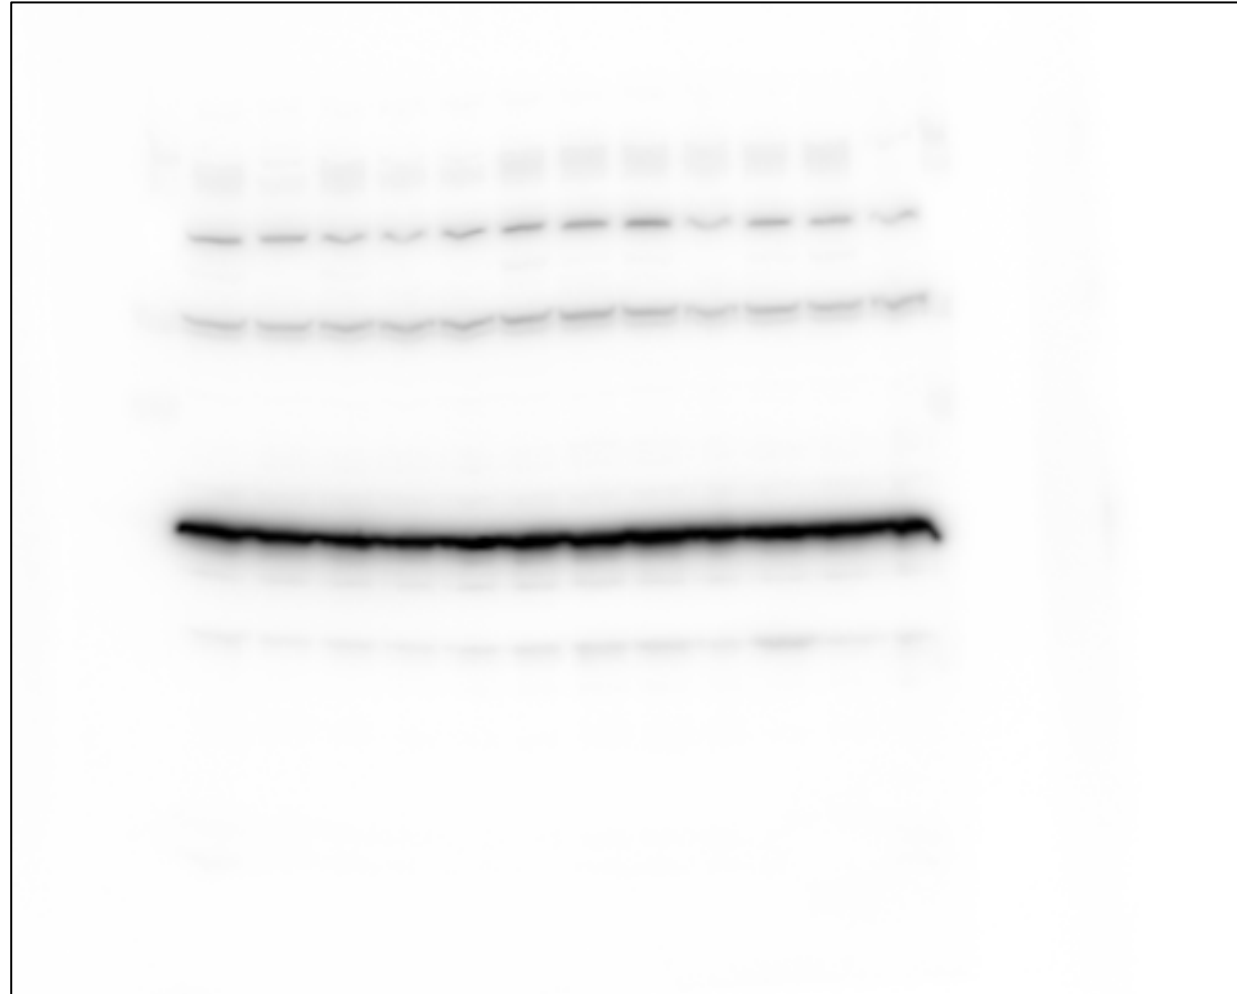

Particles -  $\alpha$ -FLAG

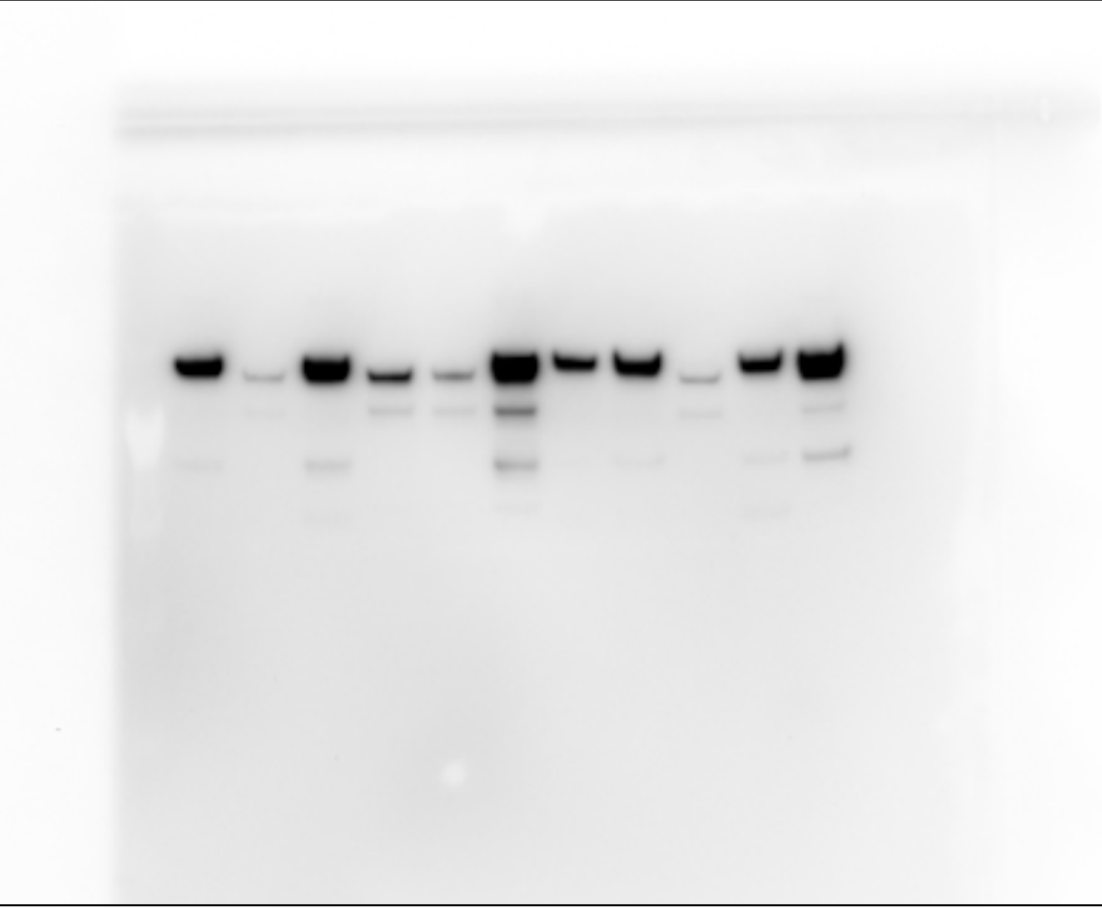

Particles -  $\alpha$ -VSVm

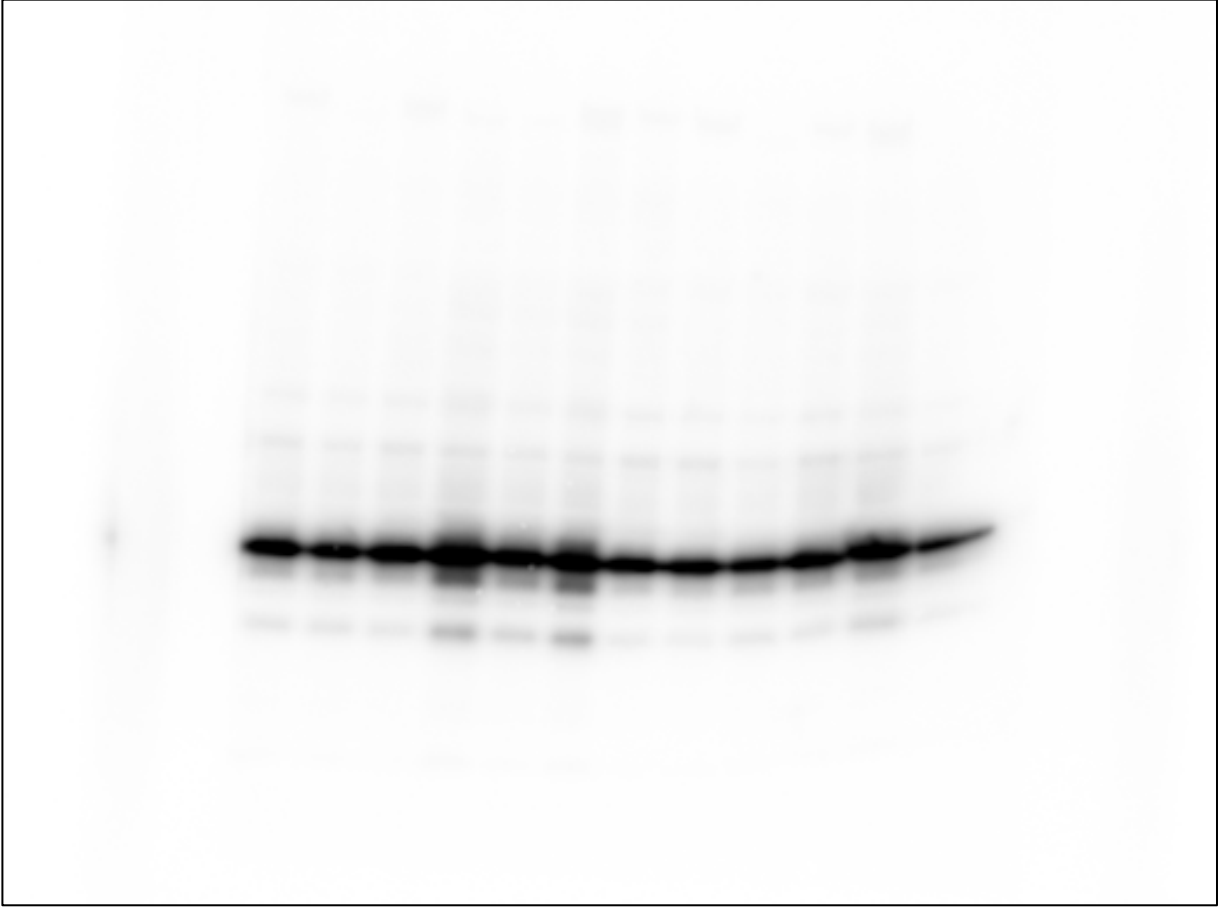

Supplement: 41564_2020_688_MOESM7_ESM.pdf [file 41564_2020_688_MOESM7_ESM.pdf]
