# Supplementary material for: Functional assessment of cell entry and receptor usage for SARS-CoV-2 and other lineage B betacoronaviruses
Source: Springer Nature journal article supplement (doi:10.1038/s41564-020-0688-y), 2020-02-24

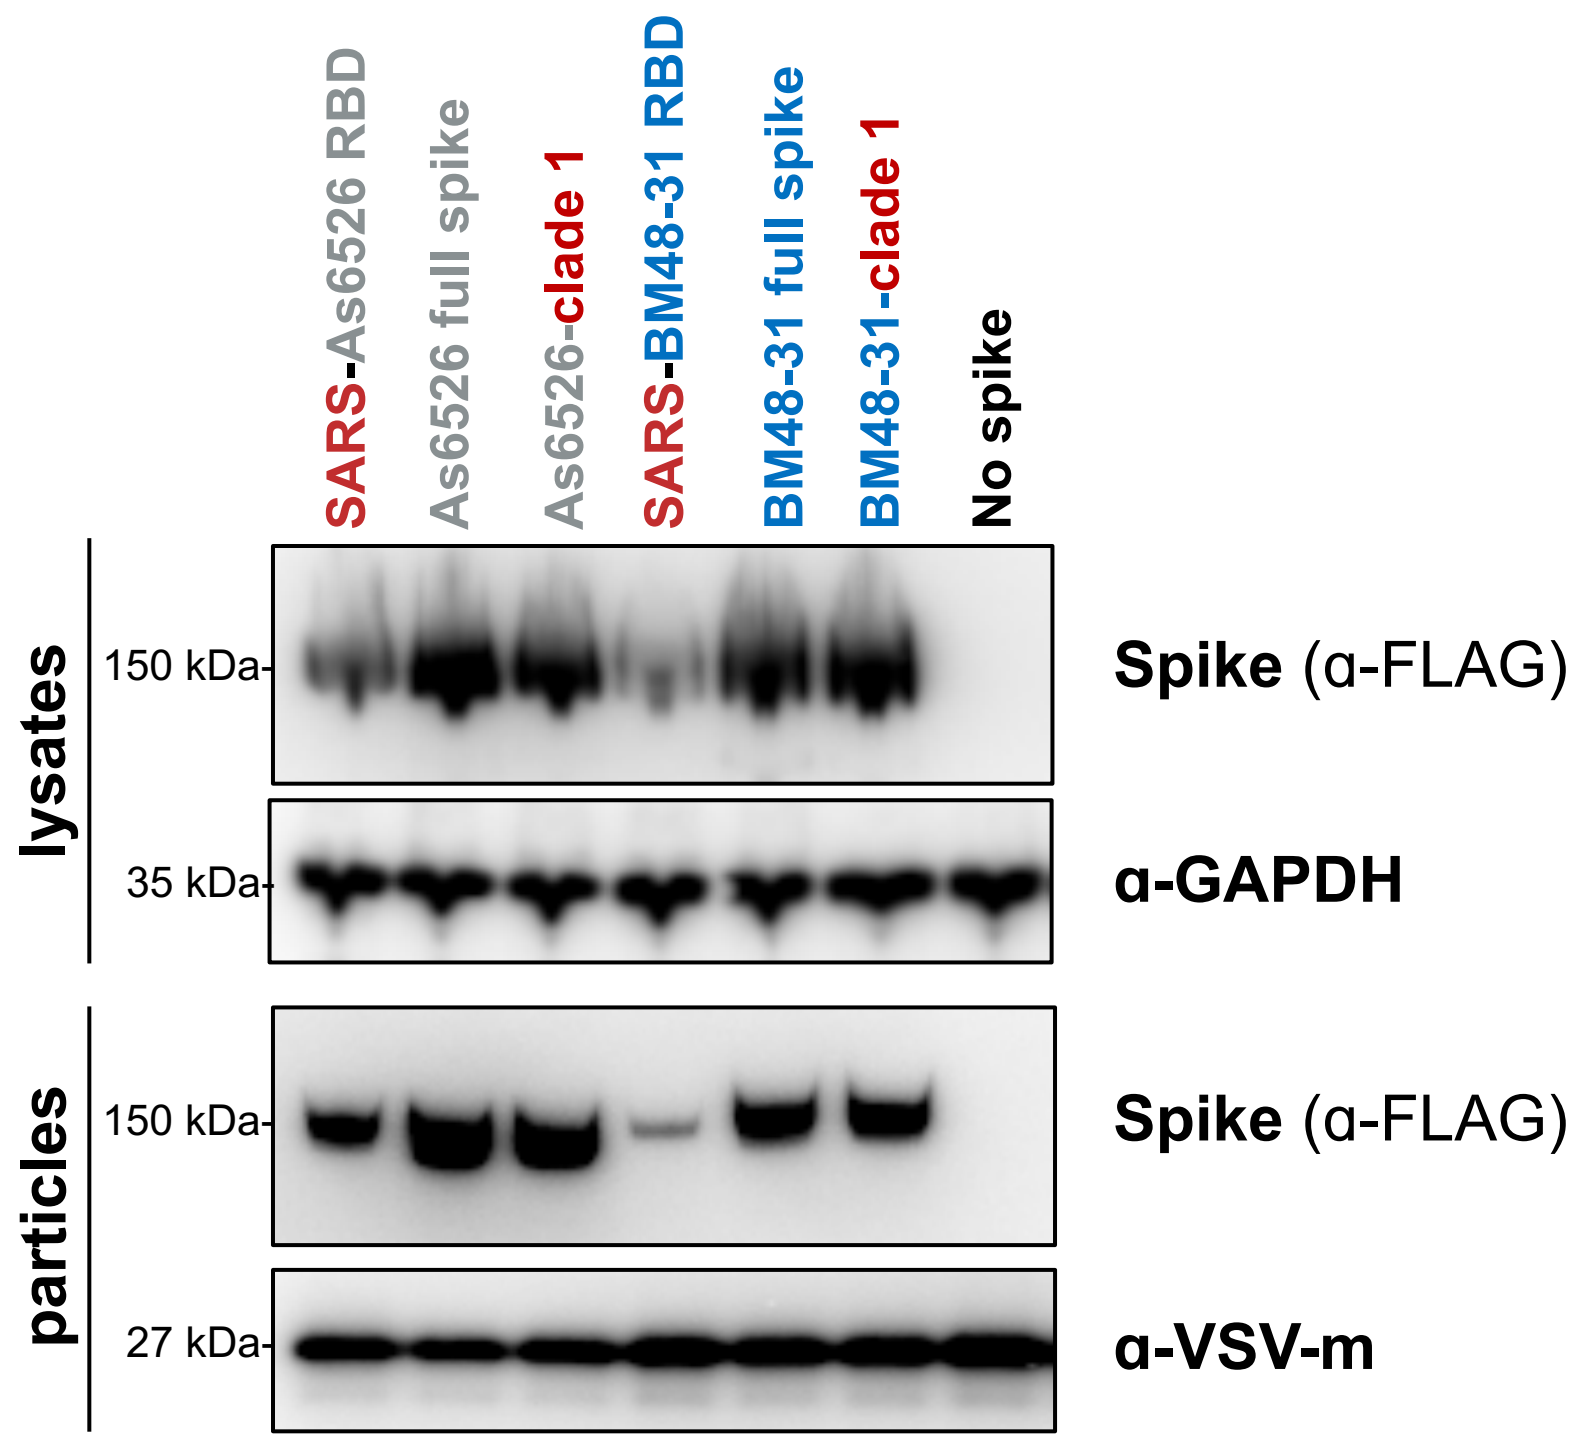

**Lysate -  $\alpha$ -FLAG** (samples run in triplicate)

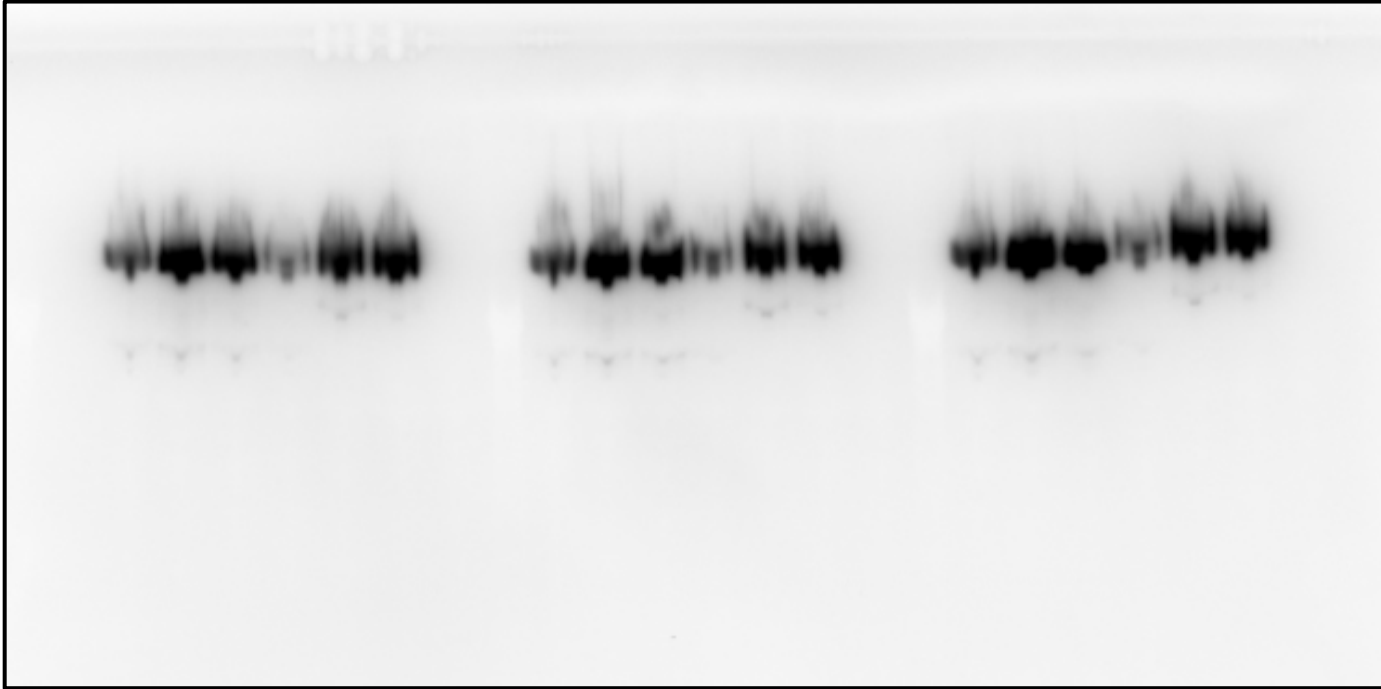

**Lysate -  $\alpha$ -GAPDH**

(samples run in duplicate, with other samples not shown in final figure. Only the first 7 bands are shown in figure 5b)

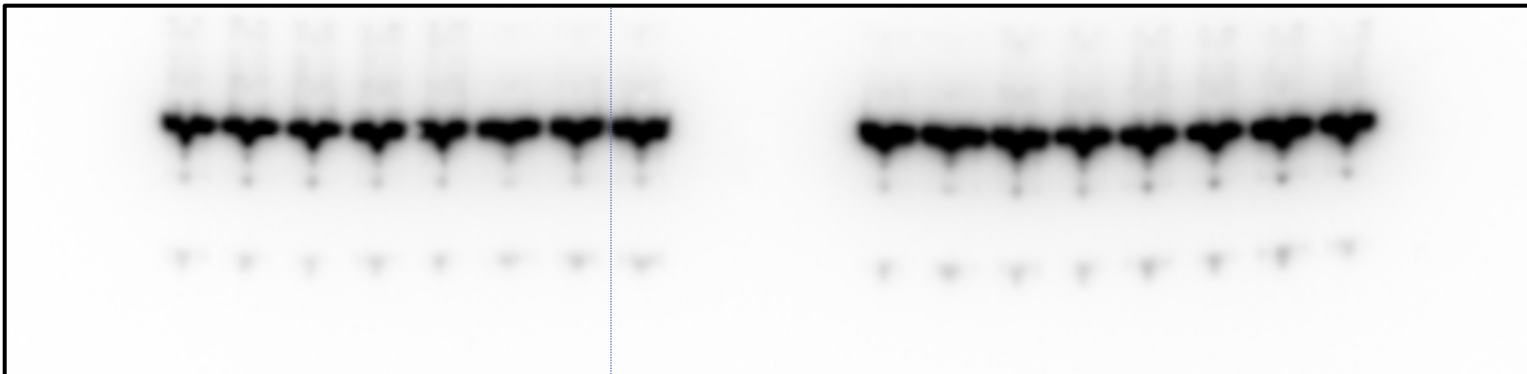

## Particles - $\alpha$ -FLAG

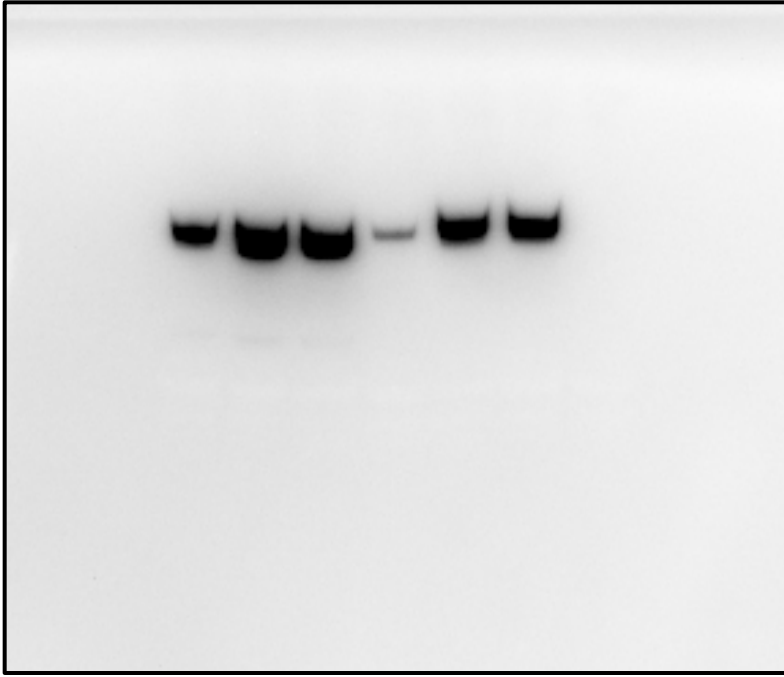

## Particles - $\alpha$ -VSVm

(samples run in duplicate, with other samples not shown in final figure.  
Only the first 7 bands are shown in figure 5b)

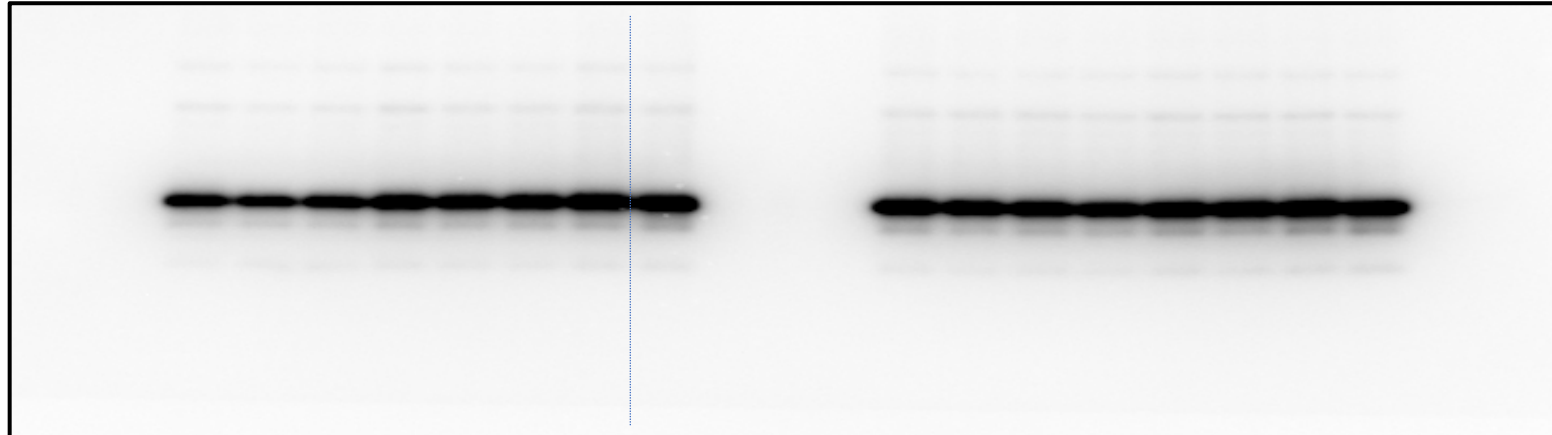

Supplement: 41564_2020_688_MOESM9_ESM.pdf [file 41564_2020_688_MOESM9_ESM.pdf]
